# Supplementary material
Source: Springer Nature journal article supplement (https://www.springermedizin.de/resource/supplementary/13012_2010_456_MOESM6_ESM.pdf/9629724)
Supplement: MOESM6 [file 9629724]

## Enabling factors

- Existence of laws, by-laws & regulations
- Existence of the Full Council
- Existence of committees & boards
- Perceived needs of stakeholders
- Collaboration with researchers

## Mechanism of change

Enforcement/  
Leadership

## Constraining factors

- Unclear lines of authority
- Inactive structures
- Low level of public awareness
- Absence of active CSOs/CBOs
- Lack of incentives
